# The aging human brain: A causal analysis of the effect of sex and age on brain volume

Jaime Gómez-Ramírez<sup>1</sup>, Miguel A. Fernández-Blázquez<sup>1</sup>, and Javier González-Rosa<sup>2,3</sup>

<sup>1</sup>Instituto de Salud Carlos III. Centro Alzheimer Fundación Reina Sofía.

<sup>2</sup>Department of Psychology, Universidad de Cádiz, Spain.

<sup>3</sup>Instituto de Investigación Biomédica de Cádiz (INIBICA)

November 20, 2020

## Abstract

*The goal of this work is to study how brain volume loss at old age is affected by factors such as age, APOE gene, sex, and school level. The study of brain volume loss at old age relative to young age requires at least in principle two MRI scans performed at both young and old age. There is, however, a way to address the problem by having only one MRI scan at old age. We compute the total brain loss of elderly subjects as the ratio between the estimated brain volume and the estimated total intracranial volume. Magnetic resonance imaging (MRI) scans of 890 healthy subjects aged 69 to 85 were assessed. The causal analysis of factors affecting brain atrophy was performed using Probabilistic Bayesian Modeling and the mathematics of Causal Inference. We find that healthy subjects get into their seventies with an average brain volume loss of 30% from their maximum brain volume at a young age. Both age and sex are causally related to brain atrophy, with women getting to elderly age with 1% larger brain volume relative to intracranial volume than men. How the brain ages and what are the reasons for sex differences in adult lifespan are causal questions that need to be addressed with causal inference and empirical data. The graphical causal modeling presented here can be instrumental in understanding a puzzling scientific inquiry -the biological age of the brain.*

## I. INTRODUCTION

The historical investigation of brain volume variation with age has at least three well defined periods: the era of autopsies, followed by the era of magnetic resonance imaging (MRI) to the present time dominated by computational anatomy making use of MRI leveraged by data-analytical methods.

Early evidence of the effect of aging on brain size and structure comes from autopsy studies in the XIX century that indicated that brain weight reduced surely but slowly with age [Boyd, 1861], [Marshall, 1892]. Autopsies helped to solidify the commonly held belief that brain weight is stable between the ages of 20 and 50 to progressively decay thereafter. Large sample autopsy-based studies, still prior to the MRI era, suggest that brain weight reaches its maximum in the late teens and declines very slowly (0.1 – 0.2% a year) till the age of 60s-70s, after that the decline is faster [Miller and Corsellis, 1977],[Esiri, 2007]. In a 1980 study [Ho et al., 1980], weights of fresh brains of 1,261 subjects aged 25 to 80, showed that the brain mass decreases rapidly after age 80. It also indicated different atrophy patterns based on ethnicity and sex: *“the rate of decrease for the brain*

*weight after age 25 years is highest for white men, followed by black women, white women, and black men, and, except that between white men and white women, the differences are statistically insignificant.*" Around the same time, brain autopsies indicated that progressive decline in brain weight begins at about 45 to 50 years of age to reach its lowest values after the age of 86 [Dekaban and Sadowsky, 1978]. The study postulated that the maximum brain weight attained in young adults was reached at 19 years of age, estimating an accumulated loss of brain weight of 11% between the ages 19 and 86. The study regressed brain weights versus age and sex groups and showed clear differential rates of change in brain weights depending on age and less affected by sex. However, studies based on autopsies present problems of reliability, selection bias and most importantly, they can't tell us anything about cerebral atrophy in living individuals. The advent of non-invasive imaging changed this.

Magnetic Resonance Imaging and before that computed tomography created the possibility of assessing cerebral volume in-vivo, non-invasively, and repeatedly [Fox and Schott, 2004]. Imaging studies revealed global volume loss and regional variation as major effects of aging in the brain. Nevertheless, the estimates of volume and tissue loss were prone to error because they required manual outlining and furthermore included a strong bias since the brain areas are selected a priori [Wenger et al., 2014], [Despotović et al., 2015].

The advent of new computerized methods sensitive to variations in size, shape, and tissue characteristics of brain structures, set the final stage in the study of brain anatomy in aging, offering a new set of tools unknown to previous researchers who needed to rely upon autopsies and manual outlining of MRI and tomographies [Ashburner et al., 2003]. Specifically, the game-changer event was Voxel-Based-Morphometry (VBM), a whole-brain, an unbiased technique for characterizing regional cerebral volume and tissue concentration differences in structural magnetic resonance images. MRI studies with automatic segmentation of in vivo aging brains have proliferated since then. In [Good et al., 2001], a tissue-based segmentation study of the effects of aging on gray and white matter and cerebral spinal fluid (CSF) in 465 normal adults, showed that gray matter volume decreased linearly with age, with a significantly steeper decline in males. Global white matter, on the other hand, did not decline with age. In addition to this, the study found that brain aging behaves locally, from areas with accelerated loss such as the insula, superior parietal gyri, central sulci, and cingulate sulci to areas with little age effect, notably the amygdala, hippocampi, and entorhinal cortex. Sowell and colleagues [Sowell et al., 2003], in a study of 176 normal individuals ranging in age from 7 to 87 years, found that areas known to myelinate early showed a more linear pattern of aging atrophy than the frontal and parietal neocortices, which continue myelination into adulthood. Along these lines, the study suggested that areas involved in language functions such as the left posterior temporal cortices, have a more protracted course of maturation than any other cortical region.

Overall, cross-sectional imaging studies of brain aging seem to agree that the aging brain losses volume in a non-linear and regional dependent way, with prefrontal cortical volume declining more rapidly than other brain regions [Thompson et al., 2003]. However, cross-sectional studies have important limitations, including large inter-individual variation in brain anatomy, and most importantly, since only one scan is made per subject, it necessarily assumes that progression dynamics of brain aging are similar between individuals. Longitudinal studies, on the other hand, by making scans at different points in time for the same individual, make possible, at least in principle, to quantify the progression of brain atrophy for each individual using the first scan as the baseline or initial condition in the nomenclature of dynamic system modeling.

There is growing evidence that age imposes a stronger influence on brain structure in older than in younger adults, but the onset and the type of decline (linear, non-linear) depends on tissue and brain region. The common understanding of tissue atrophy points to gray matter

atrophy onset may start in young adulthood, around 18, white matter, on the other hand, remains relatively stable until old age. Although we are lacking a theory of human brain aging capable of making robust predictions about brain growth and atrophy, we know that rapid growth occurs during childhood/adolescence, with a particularly dramatic growth rate during the first 3 months, approximately 1% per day, reaching the half of elderly adult brain volume by the end of the first 3 months [Holland et al., 2014]. Between 18 and 35 years old, the brain experience a period of consolidation with no brain tissue loss. After 35 years, Hedman and colleagues [Hedman et al., 2012] have suggested a steady volume loss of 0.2% per year, which accelerates gradually to an annual brain volume loss of 0.5% at age 60. After 60 years of age, the same study indicates a steady volume loss of more than 0.5%

Fjell et al. [Fjell and Walhovd, 2010] found nonlinear decline across chronological age in the hippocampus, caudate but linear decline slopes for thalamus and accumbens. In [Rast et al., 2017], cortical thinning was found to be significantly altered by hypertension and Apolipoprotein-Ee4 (APOEe4), with frontal and cingulate cortices thinning more rapidly in APOEe4 carriers. Additional longitudinal studies have found different brain atrophy patterns according to clinical conditions, including cognitive decline and Alzheimer’s disease [Rusinek et al., 2003], [Chételat et al., 2005], [Misra et al., 2009] and multiple sclerosis [Ghione et al., 2019] to cite a few. Nonetheless, small sample size and the lower reliability for segmenting small structures are important caveats in longitudinal studies [Oschwald et al., 2019].

There is, however, an approach that to our knowledge has not been undertaken with the sufficient sample size and the proper methodology. We are referring to quantify the brain loss at older age relative to the brain’s maximum size reached at some point in her young age. Although the global brain volume lacks the required granularity to map onto its cognitive processes of interest such as memory or language, it possesses, on the other hand, the singular property that it is possible to infer approximately its maximum volume via the intra cranial volume (ICV). The ICV acts as a scaffolding of the brain and sets an upper bound for the brain’s volume. Accordingly, it is possible to build a proxy of the brain atrophy that an elder person went through her adult life by means of computing the ratio between the brain volume (BV) estimation at the moment of the MRI scan and the ICV which represents the upper limit of brain volume. Thus,  $Brain2ICV = \frac{BV}{ICV}$ .

By quantifying, even if in an approximative way, the brain volume loss at older age relative to its upper bound at a young age (Brain2ICV), we can make educated guesses about the effect of brain aging in a person. The mismatch between the actual brain volume and the expected brain volume according to the person’s age might contain valuable information to better understand brain aging dynamics.

## II. METHODS

The dataset used here comes from a single-center, observational, longitudinal cohort study of 1,213 subjects [Gómez-Ramírez et al., 2019], [Fernández-Blázquez et al., 2020]. The participants of the study are home-dwelling elderly volunteers, aged 69 to 85, without relevant psychiatric, neurological, or systemic disorders. Of the initial 1,213 subjects, those that were diagnosed with MCI or dementia plus those lacking a brain MRI were excluded from our analysis, resulting in a cohort of 890 healthy elderly subjects. After signing informed consent, the participants undertake a yearly systematic clinical assessment including medical history, neurological and neuropsychological exam, blood collection and brain MRI. Ethical approval was granted by the Research Ethics Committee of *Instituto de Salud Carlos III* and written informed consent was obtained from all the participants. The authors assert that all procedures contributing to this work comply with the ethical standards of the relevant national and institutional committees on human

experimentation, and with the Helsinki Declaration of 1975 and its later amendments.

The level of education was encoded as 0 *no formal education*, 1 *primary education*, 2 *middle or high school degree* and 3 *university degree*. Cognitive status was determined with the Mini-Mental Status Examination (MMSE), Free and Cued Selective Reminding Test (FCSRT), Semantic fluency, Digit-Symbol Test and Functional Activities Questionnaire (FAQ). APOE genotype was studied with total DNA isolated from peripheral blood following standard procedures. The APOE variable was coded 1 for the  $\epsilon 4$ -carriers, and 0 for non-carriers. Family history of AD was coded as 0 for subjects with no parents or siblings diagnosed with dementia and 1 for those with at least one parent or a sibling diagnosed with dementia.

The imaging data were acquired in the sagittal plane on a 3T General Electric scanner (GE Milwaukee, WI) utilizing T1-weighted inversion recovery, supine position, flip angle  $12^\circ$ , 3-D pulse sequence: echo time *Min. full*, time inversion 600 ms., Receiver Bandwidth 19.23 kHz, field of view = 24.0 cm, slice thickness 1 mm and Freq  $\times$  Phase  $288 \times 288$ . The brain volume loss at the moment of having the MRI compared to the maximum brain volume is computed as the Brain Segmentation Volume to estimated Total Intracranial Volume (eTIV) [estimated Total Intracranial Volume aka ICV, 2020] ratio. The postprocessing was performed with FreeSurfer [Fischl, 2012], version freesurfer-darwin-OSX-EICapitan-dev-20190328-6241d26 running under a Mac OS X, product version 10.14.5.

Figure 1 the intracranial volume with brain segmentation of two subjects. The eTIV estimated by FreeSurfer has previously been reported to have linear correlations of 0.9 with manually estimated intracranial volume [Shen et al., 2010], [Malone et al., 2015]. Depending on whether CSF is included or not, one can dissociate the total brain volume (TBV) from the intracranial volume (ICV). The normalized TBV (NBV) is widely used as an index for brain atrophy, as the head size remains stable across the life span and serves as a good measure to reduce between-subject differences with regard to maximum brain size. Whole-brain volume, on the other hand, changes throughout the life span of an individual. Measurements of total brain volume (TBV) with FreeSurfer are robust across field strength [Heinen et al., 2016]. It might be noted that the estimated intracranial volume (eTIV) from FreeSurfer is not segmentation-based but calculated from the alignment to the MNI305 brain atlas [Klasson et al., 2018]. FreeSurfer exploits the relationship between the ICV and the linear transform to MNI305 space rather than counting pixels inside the cranium which would be prone to errors because the skull and the Cerebral Spinal Fluid are both dark on a T1 image [Buckner et al., 2004].

Table 1 includes the description of the variables considered in this study, providing the mean and the standard deviation for the continuous variables -Age, Memory Test Score and the ratio brain volume and intracranial volume (Brain2ICV)- and the classes together with the number of elements for each class for the categorical variables -Sex, APOE, Family history of AD, and School level. In order to assess the strength of the linear association between Brain2ICV and the predictor variables, we perform Pearson's correlation, point biserial correlation, and analysis of variance depending on whether the variable is continuous, dichotomous as in Sex, Family history of AD, and APOE or discrete with more than two values as in School level.

## i. Causal analysis

Correlation is the degree to which two variables show a tendency to vary together. Causality, on the other hand, is about the relationship between an observed effect and what caused it. For variable  $C$  to cause another variable  $E$ , ( $C \rightarrow E$ ), there must be a flow of information from the cause  $C$  to the effect  $E$ . Here, we want to identify the causal paths built on top of correlation paths that link one or more causes with an effect, specifically the variables that causally affect Brain2ICV.

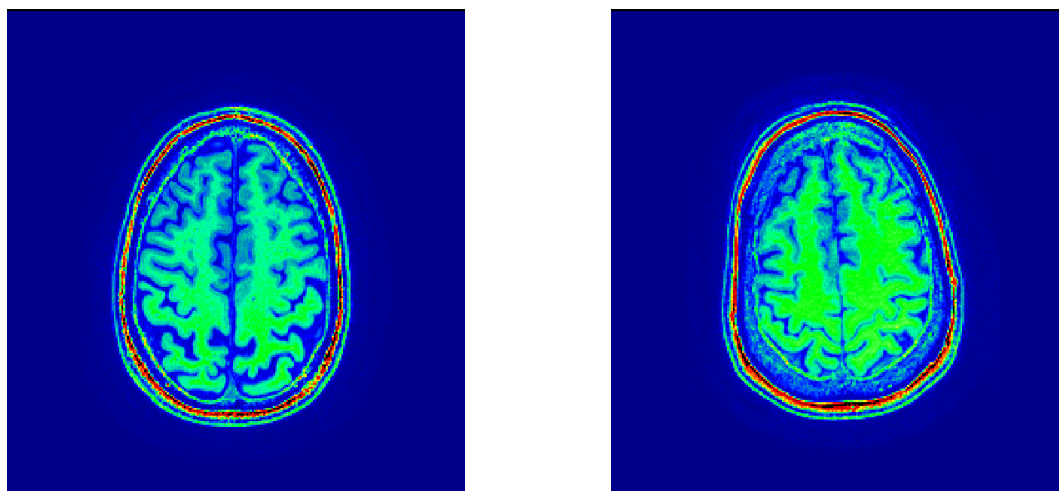

(a) Male subject, 74 years old,  $Brain2ICV = 71.96\%$  (b) Female subject, 76 years old,  $Brain2ICV = 69.97\%$ .

Figure 1: Figure 1a and Figure 1b show the intracranial volume of two subjects in the study. The Brain2ICV or ratio brain volume and intracranial volume is  $Brain2ICV = BV/ICV = 929035/1460465 = 0.7196$  for left figure, and  $Brain2ICV = BV/ICV = 929035/1327593 = 0.6997$  for the right figure.

| Variables                 | Mean  | SD    |
|---------------------------|-------|-------|
| Age                       | 74.72 | 3.86  |
| Memory Score              | 9.41  | 2.66  |
| Brain2ICV                 | 0.70  | 0.03  |
|                           | N     | %     |
| Sex                       |       |       |
| Males                     | 303   | 34.04 |
| Females                   | 587   | 65.96 |
| APOE                      |       |       |
| Non-carriers              | 726   | 81.57 |
| Heterozygous $\epsilon 4$ | 157   | 17.64 |
| Homozygous $\epsilon 4$   | 7     | 0.79  |
| School level              |       |       |
| No formal education       | 170   | 19.10 |
| Primary education         | 265   | 25.17 |
| High School               | 224   | 25.17 |
| University                | 231   | 25.96 |
| Family history of AD      |       |       |
| No                        | 670   | 75.28 |
| Yes                       | 220   | 24.72 |

Table 1: Summary of the variables used in the study: Age, Sex, APOE, School Level, Family history of AD, Memory Test Score and the estimated ratio between brain and intracranial volumes (Brain2ICV). The mean and the standard deviation is displayed for the continuous variables and the size of each class for categorical variables.



Thus, we aim at studying causal connections between correlated variables using Probabilistic Bayesian Modeling [Davidson-Pilon, 2015] and the mathematics of causal inference, *do-calculus*, proposed by Pearl [Pearl and Mackenzie, 2018].

Bayesian data analysis relies upon generative models that can be used to postulate how the available data was generated. Thus, Bayesian data analysis imposes a model-based approach upon the observed data. Models are the mathematical formulation of the observed events and the model parameters are the factors in the model affecting the observed data. While frequentist hypothesis testing is based on the squared error one would expect in many identical repetitions of the experiment, Bayesian inference defies this notion for unrealistic. As a matter of fact, on many occasions, it is not only impractical but impossible to replicate experiments which invalidate the frequentist's notion of using averages for judging an estimator [Samaniego, 2010], [Benjamin et al., 2018].

To determine the evidence for hypothesis H1 versus the alternative null hypothesis H0, we need a model of H0 and a model of H1. Bayesian model selection aims at computing the posterior distribution which contains all the information needed about the model parameters. The posterior distribution also allows us to generate predictions based on actual data and the estimated parameters. Once we have the posterior distribution we can use it to make predictions,  $\hat{y}$ , based on data  $y$  and the estimated parameters,  $\theta$ . The posterior predictive distribution is an average of conditional predictions over the posterior distribution of  $\theta$  (Equation 1).

$$p(\hat{y}|y) = \int p(\hat{y}|\theta)p(\theta|y)d\theta \quad (1)$$

Bayesian Networks are probabilistic graphical models that represent the dependencies, of a set of variables and their joint distribution [Pearl, 2009]. Specifically, a Bayesian Network is a graph with directed edges (associations) and with acyclic structure, that is, a node can't be its own ancestor or descendant. Directed Acyclic Graphs or DAG for short provides a graphical representation of the causal relationships between variables. In a DAG, contrary to statistical models, it is possible to detect the conditional independence between variables.

Figure 2 shows the DAG used to model the causal relationships between the variables in the study. We are particularly interested in clarifying the causal structure in the colored nodes depicted in Figure 2, that is, how Sex and Age affect Brain2ICV. Sex and Age are according to the DAG, the only two relevant variables that directly influence the Brain2ICV. It is worth remarking that a DAG cannot be directly generated from observational data alone, the structure of the DAG makes use of expert knowledge. Once the DAG is in place, it can be used to guide interventions that substantiate the causal reasoning that emanate from the DAG.

While the association between age and brain atrophy is indisputable, how sex mediates in brain atrophy is unclear. Furthermore, whether Brain2ICV is associated with one predictor (e.g. Age) after conditioning on the other (e.g. Sex) deserves also attention. As we have previously stated, since the questions are causal they cannot be answered from data alone and a model of the process that generate the data is required, in actuality one model for each question. The questions we need to answer are explicitly stated next.

**Q1: Is there a direct causal relationship between Sex and Brain2ICV?**

**Q2: Is there additional value for Brain2ICV in knowing Sex if we already know Age?**

Let us start with Q1, in order to investigate the relationship between Sex and Brain2ICV we build the probabilistic Bayesian model shown in the system of Equations 2.

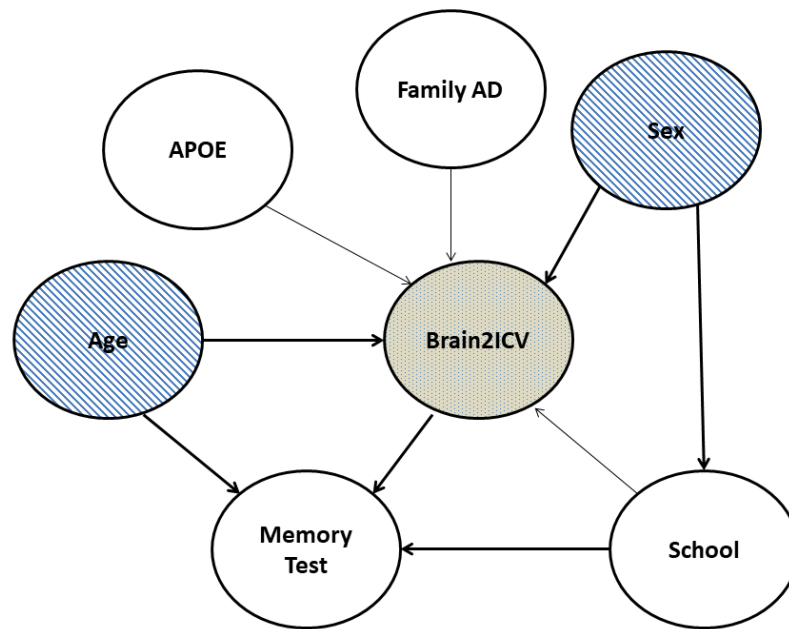

Figure 2: Directed Acyclic Graph (DAG) that postulates possible causal relationships between the variables in the study. A variable C in a causal diagram can only causally affect a variable E when there is a directed path from C to E. Based on the DAG, Sex directly influences Brain2ICV and School, Age directly influences Brain2ICV and Memory and School Level directly influences Memory. The correlation coefficient according to the correlation matrix shown in Figure 4 The strength of the arrows, thin or thick, denotes the correlation coefficient according to the correlation matrix shown in Figure 4.

$$B_i \sim N(\mu_i, \sigma) \quad (2a)$$

$$\mu_i = \gamma_{X[i]} \quad (2b)$$

$$\gamma_j \sim N(0, 1), \text{ for } j = 1, 2 \quad (2c)$$

$$\sigma \sim \text{HalfNormal}(1) \quad (2d)$$

where  $B_i$  denotes the variable Brain2ICV or the ratio between brain volume at elderly age and maximum brain volume at a young age for subject  $i$ , the index variable for Sex  $\gamma_{X[i]}$ , with index  $j = 1, 2$ , represent the average of Brain2ICV for male ( $j = 1$ ) and female ( $j = 2$ ) (no order implied), which are normally distributed using the same prior,  $N(0, 1)$ , for both male and female subjects. The prior  $\sigma$  is assumed to be normally distributed, half-normal to be exact with standard deviation equal to 1 (half-normal distribution can be directly sampled from a Normal distribution by taking the absolute value of each sampled value). Other prior distributions e.g. Exponential or Uniform can also be used.

Lastly, Q2 requires a multiple regression model with two predictors Sex and Age. We aim at understanding the following point: Once we know the Sex of an individual, Is there additional predictive power for Brain2ICV in also knowing her Age? And similarly for knowing Sex once we know Age. Thus, we need to quantify each effect and how the three variables are associated finding the conditional independence among them. Formally,  $Y \perp\!\!\!\perp X|Z$ , where  $Y$  is Brain2ICV and  $X$  is Age (or Sex) and  $Z$  is Sex or Age. The model that predicts Brain2ICV using both Sex and Age is described in the system of Equations 3.

$$B_i \sim N(\mu_i, \sigma) \quad (3a)$$

$$\mu_i = \alpha + \beta_A A_i + \gamma_{X[j]} \quad (3b)$$

$$\alpha \sim N(0, 1) \quad (3c)$$

$$\beta_A \sim N(0, 1) \quad (3d)$$

$$\gamma_X \sim N(0, 1), \text{ for } j=1,2 \quad (3e)$$

$$\sigma \sim \text{HalfNormal}(1) \quad (3f)$$

As in the previous equation,  $B_i$  denotes the variable Brain2ICV,  $\gamma_j$  represents the average of Brain2ICV for ( $j = 1$ ) male and ( $j = 2$ ) female and the prior distribution of  $\sigma$  is half-normal.  $A_i$  is the Age of subject  $i$ . Since all three variables are standardized, we expect the intercept  $\alpha$  and the parameter  $\beta_A$  to be around zero.

### III. RESULTS

We show first the results of the statistical and correlation analysis in Section i, next in Section ii we describe the causal inference results using probabilistic programming and causal diagrams.

#### i. Statistical and Correlation Analysis

Figure 3 shows the violin plot of Age grouped by Sex (Figure 3a) and Brain2ICV grouped by Sex (Figure 3b). Hypothesis testing of the age of males and females gives no difference between the two groups  $p = 0.572$  (Figure 3a). On the other hand, the t-test for the means of the Brain2ICV of males and females (Figure 3b) gives a  $p = 2.583 \cdot 10^{-8}$  less than the threshold of 1%, disproving the



null hypothesis. According to Figure 3b, females, on average, get to old age (70 or older) with 1.076% less brain atrophy than males as explained by the brain to intracranial volume ratio variable (Brain2ICV). This finding is in agreement with previous work that identified sex differences in the brain during aging and in neurodegenerative diseases. In particular, the thesis that females might have more youthful brains as compared to males is supported by forensic and postmortem studies [Dekaban and Sadowsky, 1978], [Ho et al., 1980]. And only very recently, this hypothesis has been tested in vivo with PET imaging, showing a more persistent metabolic youth in the aging female brain compared to the male brain [Goyal et al., 2019].

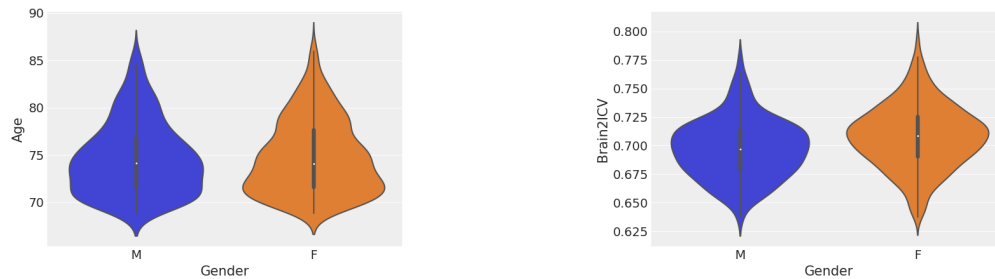

(a) Plot of the Age of the participants grouped by sex. The distribution of age for men is  $\mu_M \pm \sigma_M = 74.64 \pm 3.83$  and for women,  $\mu_F \pm \sigma_F = 74.79 \pm 3.91$ .

(b) Plot of Brain2ICV grouped by sex. The Brain2ICV distribution for men is  $\mu_M \pm \sigma_M = 0.697 \pm 0.026$  and for females is  $\mu_F \pm \sigma_F = 0.708 \pm 0.028$ .

Figure 3: Violin plots of sex distribution (left) and the Brain2ICV grouped by sex (right). The t-test for the means of the two independent samples of scores composed of the age of males and females gives no difference between the groups  $p = 0.572$ . (Figure 3a). The t-test for the means of the Brain2ICV of males and females gives a p-value  $2.583^{-8} < 0.01$  (Figure 3b).

Table 2 shows the Analysis of Variance (ANOVA) with a linear ordinary least squares (OLS) model [Seabold and Perktold, 2010] which includes the sum of squares, the F statistic and the value of Prob(F) or the probability that the null hypothesis for the null model is true. We are interested in the variables that may have an effect on Brain2ICV which according to the DAG depicted in Figure 2 are: Age, APOE, FamilyAD, Sex and School Level. As Table 2 shows, both Age and Sex have a p-value for F statistics less than the significance level of 1%, therefore the null hypothesis -Age, Sex- have no effect on the brain to ICV volume- is therefore rejected. The variable Memory Test is not included since we are interested in variables that potentially cause Brain2ICV, that is to say, the directionality of the arrow must be directed towards Brain2ICV. (The complete summary table of the OLS model  $Brain2ICV = Age + Sex + Apoe + School\ Level + Familial\ AD$  is shown in Supplementary Material, Table 5.)

Before going into the causal analysis results, we show the linear correlation between the variables in the study. The variables with larger Pearson's correlation coefficient with Brain2ICV are Age ( $\rho = -.33$ ), Sex ( $\rho = .19$ ) and Memory score test ( $\rho = .14$ ) which are also uncorrelated among them as the correlation matrix indicates (Figure 4).

## ii. Causal Analysis

Here we will find the answers to the two questions posed in Section II. To answer *Q1 -Is there a direct causal relationship between Sex and Brain2ICV?-* we proceed by studying the difference in Brain2ICV between the male and female groups. We are thus, interested in the difference between

Table 2: Analysis of Variance with a linear OLS Model. Both Age and Sex score show a p-value for F statistic less than the significance level 0.01 to reject the null hypothesis (i.e. age/sex have no effect on the brain to ICV volume). The APOE gene, familial AD and the school level, on the other hand, do not have statistical effect on brain atrophy.

|                      | sum sq   | F          | PR(>F)         |
|----------------------|----------|------------|----------------|
| Age                  | 0.077388 | 119.694321 | **3.242352e-26 |
| Sex                  | 0.021172 | 32.745601  | **1.437815e-08 |
| APOE                 | 0.000710 | 1.098909   | 2.947922e-01   |
| Family history of AD | 0.000660 | 1.021550   | 3.124283e-01   |
| School Level         | 0.002283 | 3.530481   | 6.057913e-02   |

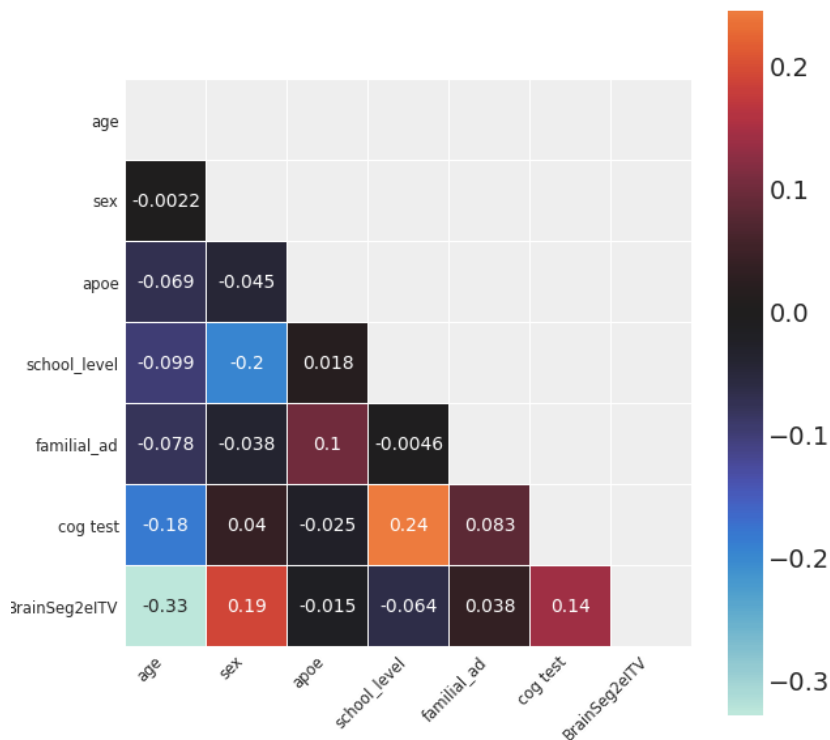

Figure 4: Correlation matrix of the variables used in the study. The variable of interest, brain volume to intracranial volume (Brain2ICV), is depicted in the last row. Age shows the strongest linear correlation with Brain2ICV ( $\rho = -0.33$ ) with Brain2ICV, followed by Sex ( $\rho = -0.19$ ) and Memory test score ( $\rho = -0.14$ ). School level, APOE and Family history of AD show no correlation with Brain2ICV.

the two groups rather than in the expected brain atrophy for each sex group which was already shown in Figure 3b. To compute this contrast, we use samples from the posterior distribution, that is to say we fit the model shown in Equation 2 to the data to have access to the posterior distribution of the difference or contrast between the male and female groups.

Table 3 shows the posterior distribution of the three parameters declared in Equation 2 ( $\mu_1, \mu_2, \sigma$ ) and the posterior of the difference between the mean of brain atrophy between the male group and the female group or  $\mu_1 - \mu_2$ . The interpretation of the parameters in Table 3 is straightforward, the mean and standard deviation of the posterior distribution of Brain2ICV males is  $0.697 \pm 0.002$  while for females is  $0.708 \pm 0.001$ . More importantly, the difference between the posterior distribution of the means shows that females get at old age with around 1% less atrophy than males,  $-0.011 \pm 0.002$ . The high posterior density interval (HDI) <sup>1</sup> is always negative, that is to say, when comparing the distribution of males and females, the area of the distribution Brain2ICV of females is larger than that of males. This confirms that sex plays a role in brain volume atrophy, with women getting into elderly age with slightly less brain loss volume relative to the maximum volume reached at a young age than men.

Table 3: The table shows the posterior distribution of the model's parameters in Equation 2. The first two rows are the expected Brain2ICV (ratio between the brain volume (BV) at an elderly age and the intracranial volume (ICV) which works as a proxy of the maximum brain volume at a young age) in each sex group (1 for Male, 2 for Female), the third row is the standard deviation and the last row denotes the expected difference in Brain2ICV between (1) males and (2) females. The contrast,  $\mu_1 - \mu_2$ , is always negative which is indicative of less atrophy in women's brain compared to men. This finding confirms previous studies in sex difference in the brain during aging, but here for the first time, via Bayesian statistical inference and posterior analysis rather than point estimates [Gamerman and Lopes, 2006], [Patil et al., 2010]

|                 | mean   | sd    | HDI 3% | HDI 97% |
|-----------------|--------|-------|--------|---------|
| $\mu_1$         | 0.697  | 0.002 | 0.694  | 0.70    |
| $\mu_2$         | 0.708  | 0.001 | 0.706  | 0.71    |
| $\sigma$        | 0.027  | 0.001 | 0.026  | 0.028   |
| $\mu_1 - \mu_2$ | -0.011 | 0.002 | -0.014 | -0.007  |

Figure 5 shows graphically the posterior distribution and the sampling for the three unobserved variables in the model ( $\mu_1, \mu_2, \sigma$ ). The variable Brain2ICV,  $B_i$ , is the observed data and therefore we do not need to sample its values. On the left-hand of Figure 5, we show the kernel density estimation of the marginal distributions of each parameter and on the right hand we show the individual sampled values.

Figure 6a makes the comparison between the posteriors for male and female Brain2CV easy to visualize. As we can see,  $\mu_1$  is negative and  $\mu_2$  is positive with the HDI for the Male group slightly wider than the Female group. Since we have computed the posterior, we can use it to simulate data to assess the predictive quality of the model by comparing how consistently the simulated data match the observed data. Figure 6b shows the *posterior predictive checks* which allows us to evaluate the model by comparing the observed data and the model predictions (100 posterior predictive samples). The figure shows a good match between the mean and the variance of the simulated data and the actual data.

<sup>1</sup>The High Posterior Density interval (HDI) is the shortest interval containing a give portion e.g 97% of the probability density. Note that HPI is not the same as a confidence interval, HDI is the probability of a variable having some value while a frequentist confidence interval contains or does not contain the true value of a parameter [Martin, 2018].

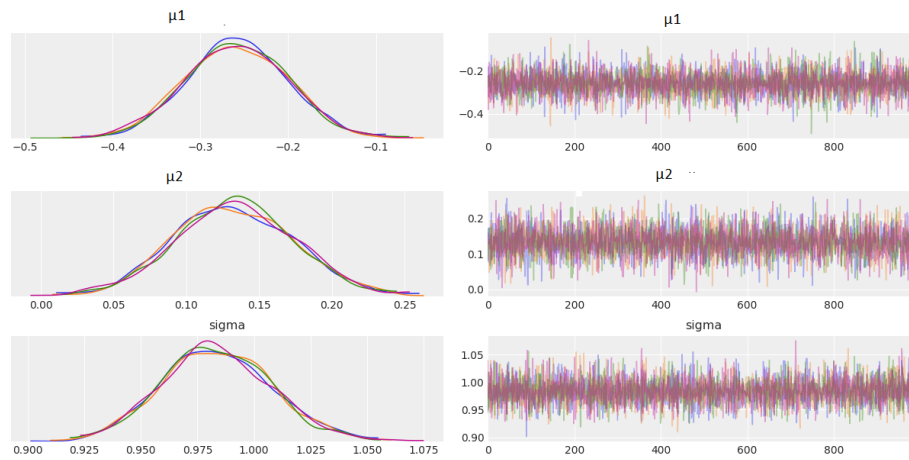

Figure 5: Posterior distribution (left-hand) and sampling (right-hand) for parameters  $\mu_1, \mu_2, \sigma$  (from top to bottom, Brain2ICV mean for men, Brain2ICV mean for women and Brain2ICV standard deviation) using PyMC3 [Salvatier et al., 2016]. Males get into older age with a more brain volume loss or less Brain to ICV ratio than women. The values have been normalized and standardized with mean 0 and standard deviation 1.

Figure 6: The black line is a KDE of the observed data, and cyan lines are KDEs computed from each one of the 100 posterior predictive samples. The cyan lines reflect the uncertainty about the inferred distribution of the predicted data. The mean and the variance of the simulated data properly match the actual data.

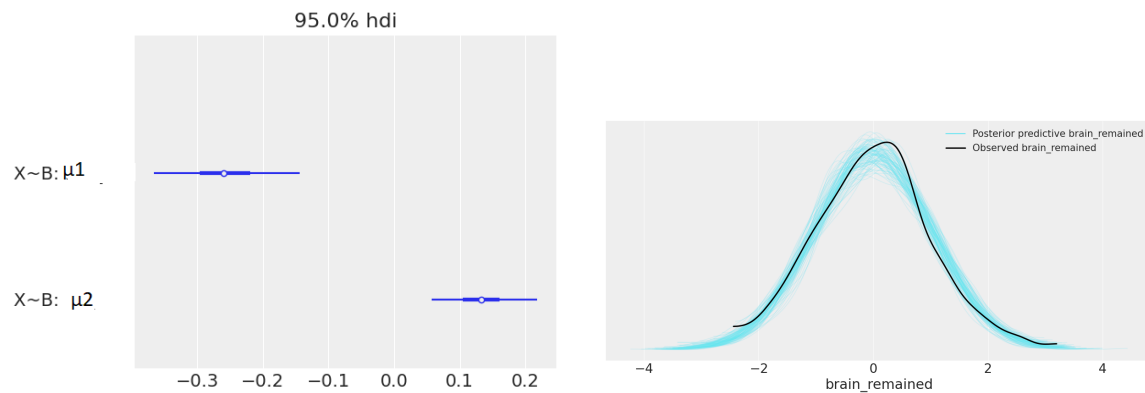

(a) Plot that compares the posterior of the parameters  $\mu_1$  (Males) and  $\mu_2$  (Females). The mean of the Brain2ICV in females is 0.133 and -0.259 for males, the standard deviation for males (0.058) is larger than in females (0.041).

(b) The black line is a KDE of the observed data, and the cyan lines are KDEs computed from each one of the 100 posterior predictive samples. The cyan lines reflect the uncertainty about the inferred distribution of the predicted data. The mean and the variance of the simulated data properly match the actual data.

Now we are in a position to answer affirmatively Question 1:

**Q1: Is there a direct causal relationship between brain atrophy -calculated as the ratio between brain size at an elderly age and maximum brain size at a young age- and sex? Yes. According to the Causal Diagram shown in Figure 2 Age has a direct effect on Brain2ICV. The expected difference or contrast between a female and a male in the sample shows that the expected Brain2ICV is larger for females.**

We address next Q2 or *Is there additional value for Brain2ICV in knowing Sex if we already know Age?* The system of equations described in Equation 3 defines a multiple regression aimed at inferring the influence of Age on Brain2ICV while controlling for Sex and is represented in Equation 4 for convenience.

$$\mu_i = \alpha_{Sex[i]} + \beta_A A_i \quad (4)$$

Table 4 shows the posterior distribution (mean standard deviation and HDI) of the multiple regression parameters declared in Equation 3 ( $\gamma_1, \gamma_2, \beta_A, \sigma$  not shown for easiness). The first two rows denote the linear relationship between Brain2ICV and each sex group (1 for Male, 2 for Female), and the last row the linear relationship between Brain2ICV and Age. Each parameter in Table 4 controls the slope of the linear relationship and thus can be interpreted as the change in the outcome (Brain2ICV) per unit change in the predictor variables (Age and Sex). Thus, one standard deviation change in Age produces a change of one-third decrease in the standard deviation in Brain2ICV.

Table 4: Posterior distributions of the model's parameters in Equation 3. Posterior of the average Brain2ICV for males  $\mu_1$ , posterior of the average Brain2ICV for females  $\mu_2$  and Posterior of the age coefficient  $\beta_A$ .

The  $\beta_A$  coefficient describes a negative influence of the Age predictor on the outcome, Brain2ICV (negative mean). Similarly, there is a negative association between being Male and Brain2ICV. Thus, both Age and Masculine Sex are negatively associated with brain preservation at old age, computed as the ratio between the estimated brain volume (BV) and the estimated total intracranial volume (ICV). The Female Sex group, on the other hand, is positively associated with

|                     |           | mean   | sd    | HDI 3% | HDI 97% |
|---------------------|-----------|--------|-------|--------|---------|
| brain preservation. | $\mu_1$   | -0.266 | 0.052 | -0.369 | -0.177  |
|                     | $\mu_2$   | 0.138  | 0.037 | 0.070  | 0.208   |
|                     | $\beta_A$ | -0.33  | 0.031 | -0.392 | -0.277  |

Based on the results show in Table 4 it is possible to graphically qualify, both in direction and magnitude, the weight that Sex and Age have separately on Brain2ICV. Figure 7 represents the mean and the standard deviation of the posteriors in the multiple regression shown in Table 4. The expected change per unit in Brain2ICV for elderly males is -0.266 and 0.138 for females. The expected change per unit in Brain2ICV for Age is -0.33, that is, an increase of one standard deviation in age reduces brings down the Brain2ICV by one third.

Finally, Figure 8 allows to visually inspect the results of the multiple regression of the effect of both Age and Sex on Brain2ICV,  $Age + Sex \rightarrow Brain2ICV$ , compared with the simple linear regressions  $Sex \rightarrow Brain2ICV$ , and  $Age \rightarrow Brain2ICV$  (shown in the Supplementary Materials). The main piece of information to extract from the figure is that once we know one of the two predictors, knowing the other one does not provide additional information about Brain2ICV. For instance,  $\beta_A$  has a very similar mean and standard deviation in the bivariate case (green bar) as in

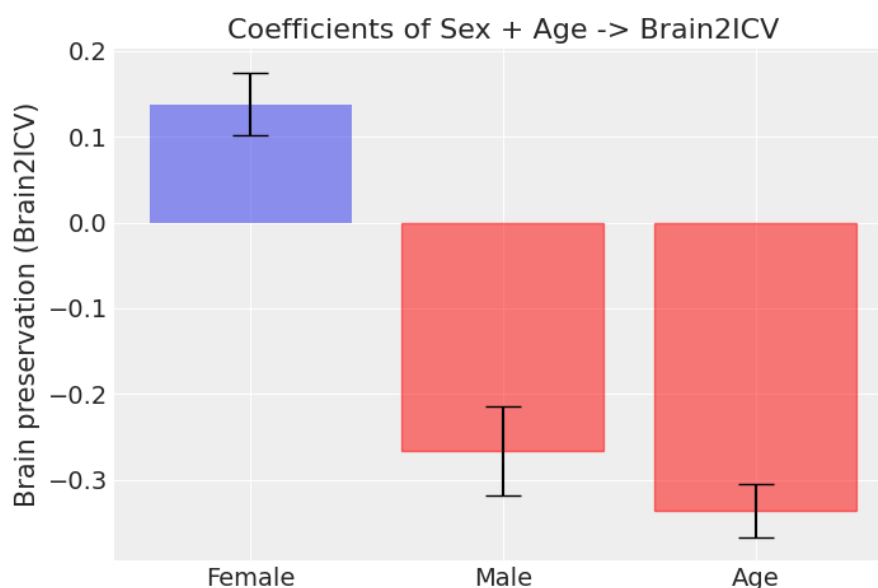

Figure 7: Direction and magnitude( $\mu$  and  $\sigma$ ) of the posterior distribution of the parameters in the multiple regression model (Equation 4). Age and Male Sex are both negatively associated with brain preservation in older age, being Age, the stronger association. Female Sex is, on the other hand, positively associated although with a smaller effect than both Male Sex and Age.

the multivariate regression case (blue bar). Or more easily put, if we know the Age, there is no additional gain in knowing also the Sex if we care about inferring Brain2ICV. Accordingly, we can answer Q2 in the negative.

**Q2: Is there additional value for Brain2ICV in knowing Sex if we already know Age? No. Once we know the age of a subject knowing also her age conveys little information in predicting her Brain2ICV.**

#### IV. DISCUSSION

The goal of this work is to study how brain atrophy is affected by factors such as age, APOE gene, sex, or school level among others. The study of brain volume loss at old age relative to young age requires, at least in principle, to have available MRI scans performed at either young and old age. There is, however, a way to address this problem having, as it is our case, only MRI scans at old age (70 years old or older). We compute the total brain loss of elderly subjects as the ratio between the estimated brain volume (BV) and the estimated total intracranial volume (ICV), called Brain2ICV for short. Thus, having only one MRI it is possible to ascertain the diminution of brain volume within the cranium relative to brain volume at a young age. We conceptualize the brain as a dynamic system inside a fossil container which sets the upper limit of brain volume. Accordingly, Brain2ICV represents the percentage of the volume occupied by the brain (BV) inside the cranium (ICV) which is used as a proxy of the maximum brain volume reached at a young age.

We find out that for the variables considered in this study -Age, APOE, Family history of AD, Sex, School Level- only Age and Sex affect Brain2ICV. Age is, as expected, negatively associated



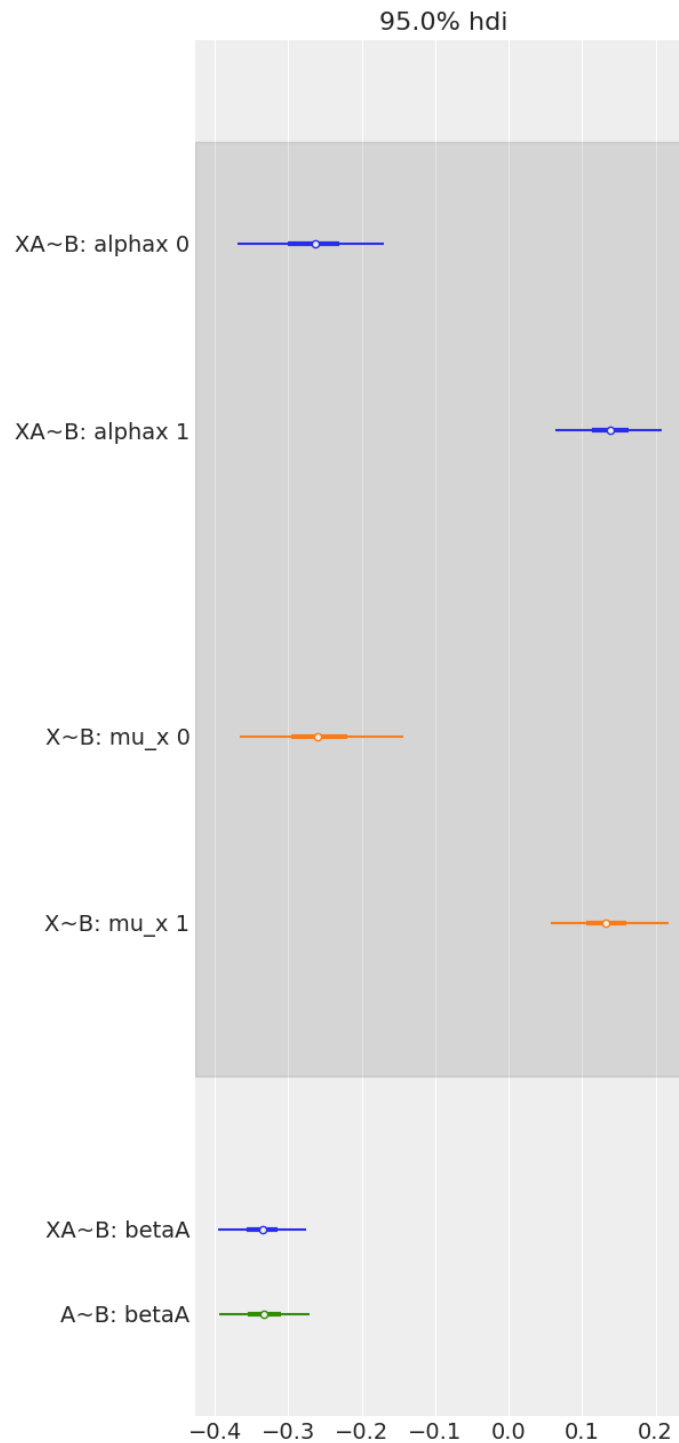

Figure 8: Forest plot to compare the effect of Age and Sex on Brain2ICV, separately and together in multiple regression. From top to bottom, the first two bars (in blue) represent the contrast in multiple regression. In the multiple regression model,  $Age + Sex \rightarrow Brain2ICV$ . The two middle bars (in orange) represent the posterior of Sex in the simple linear regression model  $Sex \rightarrow Brain2ICV$ . The blue bottom bar depicts the posterior of Age in the multiple regression model,  $Age + Sex \rightarrow Brain2ICV$ , and the green bar the posterior of Age but this time for the simple regression model,  $Age \rightarrow Brain2ICV$ . Once we know Age (green bar at the bottom) there is no additional information in knowing also Sex (blue bar at the bottom) because the mean and the uncertainty remain mostly unchanged. Likewise, if we know Sex (orange bars) there is no significant information gain in also knowing Sex (blue bars at the top).

with Brain2ICV, the older the brain gets the smaller is the ratio between the brain volume and the intracranial volume. More interestingly, we find that Sex plays a role in brain atrophy with Females having on average 1% larger Brain2ICV than males. In order of importance, Age is the most important factor for brain volume loss, followed by masculine sex, and lastly feminine sex which is protective (Figure 7).

Methodologically speaking, this work departs from the approach of comparing differences between groups via point estimates and statistical testing. The pitfalls and difficulties associated with the statistical testing approach have been described both abundantly and convincingly [Association et al., 2016], [Benjamin et al., 2018], [Wasserstein et al., 2019] and we will therefore do not linger more on this point. Here, we follow a Bayesian approach to estimate posterior probability distributions rather than point estimates. It is worth reminding that under the Bayesian outlook, probabilities are tools to quantify uncertainty [Jaynes, 2003], [Gomez-Ramirez and Sanz, 2013]. Thus, we use probability distributions to summarize the entire plausibilities of each possible value of the parameter defined in the model. For example, the posterior distribution of the mean Brain2ICV in the female group entirely lies on the positive side, that is, we are certain that female sex and Brain2ICV are positively associated, while the opposite occurs for males, the posterior fully lies on the negative side which tells us that masculine sex and Brain2ICV are negatively associated.

The questions that are being addressed here are simple to pose; Do age affects brain atrophy? Which factors are causally connected with the loss of brain volume found in old age, sex, years of school, others? These questions are essentially causal and therefore cannot be responded to with correlations and data alone. We must postulate first a causal model which can be seen as the generator of the observed data. The causal diagram is postulated in Figure 2 and discussed in depth in Section ii.

The final goal of our methodological undertaking is no other than to achieve a causal understanding of the factors at play in the variability of brain volume loss in aging. To state that age causes aging is a platitude. However, behind this innocuous statement hides one of the defining scientific challenges of our time, Is aging inevitable? and Can we devise interventions aimed at modifying the aging process? Since we lack a theory of aging, what causes aging and how it progresses is ridden in uncertainty.

There at least two major reasons for the lack of attention that causal reasoning has received in the scientific literature. One is historical and obeys to reasons not other than the personal preferences that leading scientists. As magisterially recounted by Judea Pearl in [Pearl and Mackenzie, 2018], causality was deliberately removed from statistics by Karl Pearson who considered cause and effect as animistic and unscientific concepts to be replaced by Contingency Tables which in Pearson's mind were "the ultimate statement of the scientific description between two things" [Pearson, 1892]. The second and most important reason for the neglect of causality is that correlations, contrary to causal conclusions, do not require a controlled experiment and are therefore easy to compute.

The algebra created by Pearl, *do-calculus* [Pearl, 2009], [Pearl et al., 2016], can be treated as an extension of probability theory to investigate causal statements where before was only possible to perform observational analysis. While correlations have proved to be an extraordinarily successful tool to quantify pairwise relationships, correlations are lacking in situations where variables cannot be isolated. In such a scenario, we need to understand how the different variables interact with each other, which entails incorporating the direction in the association between two variables. A variable may cause another and this cannot be accounted for with correlations which are by definition symmetric.

We hope that the utility and promise of causal analysis have been rendered clear at this point.

It is however worth recalling that causal analysis requires to postulate upfront the process that generates the data, that is to say, it requires the modeler's input. The identification of causal associations will be consequently dependent on the model's complexity. For example in our case, since we are interested in the effect of Sex and Age on Brain2ICV and the predictors are conditional independent, the causal analysis is fairly simple. Formally and in the language of *do-calculus*, Brain2ICV is a collider,  $X \rightarrow Y \leftarrow Z$ . In a collider situation conditioning on, for example, Z could induce a statistical association between X and Y misleading us into thinking that Age changes with Sex which is not the case. This is addressed in the multiple regression model (System of Equations 3) where we quantify each effect -Age on Brain2ICV and Sex on Brain2ICV- to find that the variables are conditionally independent  $Y \perp\!\!\!\perp X|Z$ , (Y is not associated with X, after conditioning on Z) and  $Y \perp\!\!\!\perp Z|X$  (Y is not associated with Z, after conditioning on X). Importantly, the same methodological framework can be used in more convoluted analysis, for example, the effect of Brain2ICV, Age, Sex, and School years on Memory Test Scores (Figure 2). There is no a direct causal path from Age to Memory or from Brain2ICV to Memory, the associations are in reality spurious and caused by the influence of variable(s) not included in the model (Supplementary Material).

This study is not without limitations. First, we are using whole-brain segmentation data without differentiating between brain tissues or brain anatomical structures. Second, in positing as we do a causal model, we are describing the causal mechanisms involved in brain aging, a complex biological process, lacking even a universally accepted definition [Viña et al., 2007]. The causal diagram postulated in Figure 2 may be incomplete as it is the case, for example, in the causal relationships between variables related to memory. Nevertheless, our focus on the direct effect on brain volume atrophy makes both limitations not particularly concerning. Although a more granular data acquisition of brain anatomy would convey information that is missing in this study, the approach used here makes it uniquely possible to investigate the shrinkage of the brain using only one measurement (a single MRI). Since the brain is contained within the scaffolding of the cranium, we can estimate the total brain volume loss taking the intracranial volume as the asymptotic volume. This method is impractical for structures inside the cerebrum since we would be missing the fossil-like container that the cranium provides for the entire organ.

Part of the novelty and interest of the study relies upon its methodological underpinning, which departs from point estimates and linear associations between variables. We use Bayesian probabilistic programming to study in a principled way causal inference, combining the flexibility of Bayesian probability and the applicability of sampling theory in a coherent decision theoretical framework. Although it is beyond reach to verify the validity or completeness of causal diagrams, a causal diagram together with the appropriate algebra (do-calculus) enable causal reasoning, paving the way from hypothesis testing and correlations to interventions and counterfactual reasoning, reaching thus the proper epistemological ladder required to capture the structure that generates events in nature.

## REFERENCES

- [Ashburner et al., 2003] Ashburner, J., Csernansk, J. G., Davatzikos, C., Fox, N. C., Frisoni, G. B., and Thompson, P. M. (2003). Computer-assisted imaging to assess brain structure in healthy and diseased brains. *The Lancet Neurology*, 2(2):79–88.
- [Association et al., 2016] Association, A. S. et al. (2016). Statement on statistical significance and p-values. *The American Statistician*, 70(2):129–133.

- [Benjamin et al., 2018] Benjamin, D. J., Berger, J. O., Johannesson, M., Nosek, B. A., Wagenmakers, E.-J., Berk, R., Bollen, K. A., Brembs, B., Brown, L., Camerer, C., et al. (2018). Redefine statistical significance. *Nature Human Behaviour*, 2(1):6–10.
- [Boyd, 1861] Boyd, R. (1861). Tables of the weights of the human body and internal organs, etc. *Phil. Trans. Royal Soc. London*, 151(Part I).
- [Buckner et al., 2004] Buckner, R. L., Head, D., Parker, J., Fotenos, A. F., Marcus, D., Morris, J. C., and Snyder, A. Z. (2004). A unified approach for morphometric and functional data analysis in young, old, and demented adults using automated atlas-based head size normalization: reliability and validation against manual measurement of total intracranial volume. *Neuroimage*, 23(2):724–738.
- [Chételat et al., 2005] Chételat, G., Landeau, B., Eustache, F., Mézenge, F., Viader, F., de La Sayette, V., Desgranges, B., and Baron, J.-C. (2005). Using voxel-based morphometry to map the structural changes associated with rapid conversion in mci: a longitudinal mri study. *Neuroimage*, 27(4):934–946.
- [Davidson-Pilon, 2015] Davidson-Pilon, C. (2015). *Bayesian methods for hackers: probabilistic programming and Bayesian inference*. Addison-Wesley Professional.
- [Dekaban and Sadowsky, 1978] Dekaban, A. S. and Sadowsky, D. (1978). Changes in brain weights during the span of human life: relation of brain weights to body heights and body weights. *Annals of Neurology: Official Journal of the American Neurological Association and the Child Neurology Society*, 4(4):345–356.
- [Despotović et al., 2015] Despotović, I., Goossens, B., and Philips, W. (2015). Mri segmentation of the human brain: challenges, methods, and applications. *Computational and mathematical methods in medicine*, 2015.
- [Esiri, 2007] Esiri, M. M. (2007). Ageing and the brain. *The Journal of Pathology: A Journal of the Pathological Society of Great Britain and Ireland*, 211(2):181–187.
- [estimated Total Intracranial Volume aka ICV, 2020] estimated Total Intracranial Volume aka ICV (2020). Freesurfer. <http://www.freesurfer.net/fswiki/eTIV>.
- [Fernández-Blázquez et al., 2020] Fernández-Blázquez, M. A., Noriega-Ruiz, B., Ávila Villanueva, M., Valentí-Soler, M., Frades-Payo, B., Ser, T. D., and Gómez-Ramírez, J. (2020). Impact of individual and neighborhood dimensions of socioeconomic status on the prevalence of mild cognitive impairment over seven-year follow-up. *Aging & Mental Health*, 0(0):1–10. PMID: 32067489.
- [Fischl, 2012] Fischl, B. (2012). Freesurfer. *Neuroimage*, 62(2):774–781.
- [Fjell and Walhovd, 2010] Fjell, A. M. and Walhovd, K. B. (2010). Structural brain changes in aging: courses, causes and cognitive consequences. *Reviews in the Neurosciences*, 21(3):187–222.
- [Fox and Schott, 2004] Fox, N. C. and Schott, J. M. (2004). Imaging cerebral atrophy: normal ageing to alzheimer’s disease. *The Lancet*, 363(9406):392–394.
- [Gamerman and Lopes, 2006] Gamerman, D. and Lopes, H. F. (2006). *Markov chain Monte Carlo: stochastic simulation for Bayesian inference*. CRC Press.

- [Ghione et al., 2019] Ghione, E., Bergsland, N., Dwyer, M. G., Hagemeyer, J., Jakimovski, D., Paunkoski, I., Ramasamy, D. P., Carl, E., Hohnacki, D., Kolb, C., et al. (2019). Aging and brain atrophy in multiple sclerosis. *Journal of Neuroimaging*.
- [Gómez-Ramírez et al., 2019] Gómez-Ramírez, J., Ávila-Villanueva, M., Payo, B. F., Soler, M. V., Sevilla, M. A. Z., del Ser Quijano, T., and Fernández-Blázquez, M. Á. (2019). Exploratory data analysis in the vallecas project: A six years longitudinal study in healthy brain aging. *bioRxiv*, page 674853.
- [Gomez-Ramirez and Sanz, 2013] Gomez-Ramirez, J. and Sanz, R. (2013). On the limitations of standard statistical modeling in biological systems: A full bayesian approach for biology. *Progress in Biophysics and Molecular Biology*.
- [Good et al., 2001] Good, C. D., Johnsrude, I. S., Ashburner, J., Henson, R. N., Friston, K. J., and Frackowiak, R. S. (2001). A voxel-based morphometric study of ageing in 465 normal adult human brains. *Neuroimage*, 14(1):21–36.
- [Goyal et al., 2019] Goyal, M. S., Blazey, T. M., Su, Y., Couture, L. E., Durbin, T. J., Bateman, R. J., Benzinger, T. L.-S., Morris, J. C., Raichle, M. E., and Vlassenko, A. G. (2019). Persistent metabolic youth in the aging female brain. *Proceedings of the National Academy of Sciences*, 116(8):3251–3255.
- [Hedman et al., 2012] Hedman, A. M., van Haren, N. E., Schnack, H. G., Kahn, R. S., and Hulshoff Pol, H. E. (2012). Human brain changes across the life span: a review of 56 longitudinal magnetic resonance imaging studies. *Human brain mapping*, 33(8):1987–2002.
- [Heinen et al., 2016] Heinen, R., Bouvy, W. H., Mendrik, A. M., Viergever, M. A., Biessels, G. J., and De Bresser, J. (2016). Robustness of automated methods for brain volume measurements across different mri field strengths. *PloS one*, 11(10):e0165719.
- [Ho et al., 1980] Ho, K.-C., Roessmann, U., Straumfjord, J., and Monroe, G. (1980). Analysis of brain weight. i. adult brain weight in relation to sex, race, and age. *Archives of pathology & laboratory medicine*, 104(12):635–639.
- [Holland et al., 2014] Holland, D., Chang, L., Ernst, T. M., Curran, M., Buchthal, S. D., Alicata, D., Skranes, J., Johansen, H., Hernandez, A., Yamakawa, R., et al. (2014). Structural growth trajectories and rates of change in the first 3 months of infant brain development. *JAMA neurology*, 71(10):1266–1274.
- [Jaynes, 2003] Jaynes, E. T. (2003). *Probability Theory: The Logic of Science*. Cambridge University Press.
- [Klasson et al., 2018] Klasson, N., Olsson, E., Eckerström, C., Malmgren, H., and Wallin, A. (2018). Estimated intracranial volume from freesurfer is biased by total brain volume. *European Radiology Experimental*, 2(1):24.
- [Malone et al., 2015] Malone, I. B., Leung, K. K., Clegg, S., Barnes, J., Whitwell, J. L., Ashburner, J., Fox, N. C., and Ridgway, G. R. (2015). Accurate automatic estimation of total intracranial volume: a nuisance variable with less nuisance. *Neuroimage*, 104:366–372.
- [Marshall, 1892] Marshall, J. (1892). Relations between the weight of the brain and its parts, and the stature and mass of the body, in man. *Journal of Anatomy and Physiology*, 26(Pt 4):445.
- [Martin, 2018] Martin, O. (2018). *Bayesian Analysis with Python: Introduction to statistical modeling and probabilistic programming using PyMC3 and ArviZ*. Packt Publishing Ltd.

- [Miller and Corsellis, 1977] Miller, A. and Corsellis, J. (1977). Evidence for a secular increase in human brain weight during the past century. *Annals of human biology*, 4(3):253–257.
- [Misra et al., 2009] Misra, C., Fan, Y., and Davatzikos, C. (2009). Baseline and longitudinal patterns of brain atrophy in mci patients, and their use in prediction of short-term conversion to ad: results from adni. *Neuroimage*, 44(4):1415–1422.
- [Oswald et al., 2019] Oswald, J., Guye, S., Liem, F., Rast, P., Willis, S., Röcke, C., Jäncke, L., Martin, M., and Mérillat, S. (2019). Brain structure and cognitive ability in healthy aging: a review on longitudinal correlated change. *Reviews in the neurosciences*.
- [Patil et al., 2010] Patil, A., Huard, D., and Fonnesbeck, C. J. (2010). Pymc: Bayesian stochastic modelling in python. *Journal of statistical software*, 35(4):1.
- [Pearl, 2009] Pearl, J. (2009). *Causality: Models, Reasoning and Inference*. Cambridge University Press.
- [Pearl et al., 2016] Pearl, J., Glymour, M., and Jewell, N. P. (2016). *Causal inference in statistics: A primer*. John Wiley & Sons.
- [Pearl and Mackenzie, 2018] Pearl, J. and Mackenzie, D. (2018). *The book of why: the new science of cause and effect*. Basic Books.
- [Pearson, 1892] Pearson, K. (1892). The grammar of science. *Nature*, 46(1183):199–200.
- [Rast et al., 2017] Rast, P., Kennedy, K. M., Rodrigue, K. M., Robinson, P. R., Gross, A. L., McLaren, D. G., Grabowski, T., Schaie, K. W., and Willis, S. L. (2017). Apoe $\epsilon$ 4 genotype and hypertension modify 8-year cortical thinning: five occasion evidence from the seattle longitudinal study. *Cerebral Cortex*, 28(6):1934–1945.
- [Rusinek et al., 2003] Rusinek, H., De Santi, S., Frid, D., Tsui, W.-H., Tarshish, C. Y., Convit, A., and de Leon, M. J. (2003). Regional brain atrophy rate predicts future cognitive decline: 6-year longitudinal mr imaging study of normal aging. *Radiology*, 229(3):691–696.
- [Salvatier et al., 2016] Salvatier, J., Wiecki, T. V., and Fonnesbeck, C. (2016). Probabilistic programming in python using pymc3. *PeerJ Computer Science*, 2:e55.
- [Samaniego, 2010] Samaniego, F. J. (2010). *A comparison of the Bayesian and frequentist approaches to estimation*. Springer Science & Business Media.
- [Seabold and Perktold, 2010] Seabold, S. and Perktold, J. (2010). statsmodels: Econometric and statistical modeling with python. In *9th Python in Science Conference*.
- [Shen et al., 2010] Shen, L., Saykin, A. J., Kim, S., Firpi, H. A., West, J. D., Risacher, S. L., McDonald, B. C., McHugh, T. L., Wishart, H. A., and Flashman, L. A. (2010). Comparison of manual and automated determination of hippocampal volumes in mci and early ad. *Brain imaging and behavior*, 4(1):86–95.
- [Sowell et al., 2003] Sowell, E. R., Peterson, B. S., Thompson, P. M., Welcome, S. E., Henkenius, A. L., and Toga, A. W. (2003). Mapping cortical change across the human life span. *Nature neuroscience*, 6(3):309.
- [Thompson et al., 2003] Thompson, P. M., Hayashi, K. M., De Zubicaray, G., Janke, A. L., Rose, S. E., Semple, J., Herman, D., Hong, M. S., Dittmer, S. S., Doddrell, D. M., et al. (2003). Dynamics of gray matter loss in alzheimer’s disease. *Journal of neuroscience*, 23(3):994–1005.



- [Viña et al., 2007] Viña, J., Borrás, C., and Miquel, J. (2007). Theories of ageing. *IUBMB life*, 59(4-5):249–254.
- [Wasserstein et al., 2019] Wasserstein, R. L., Schirm, A. L., and Lazar, N. A. (2019). Moving to a world beyond  $p < 0.05$ . *The American Statistician*, 73(sup1):1–19.
- [Wenger et al., 2014] Wenger, E., Mårtensson, J., Noack, H., Bodammer, N. C., Kühn, S., Schaefer, S., Heinze, H.-J., Düzel, E., Bäckman, L., Lindenberger, U., et al. (2014). Comparing manual and automatic segmentation of hippocampal volumes: reliability and validity issues in younger and older brains. *Human brain mapping*, 35(8):4236–4248.

## V. SUPPLEMENTARY MATERIAL

Table 5 shows the summary table of the OLS model  $brain2icv \sim age + sex + apoe + school\ level + familial\ AD$  with the values normalized.

Table 5: Summary table of OLS model  $brain2icv \sim age + sex + apoe + school\ level + familial\ AD$  [Seabold and Perktold, 2010].)

|                          |                           |                            |          |
|--------------------------|---------------------------|----------------------------|----------|
| <b>Dep. Variable:</b>    | fr_BrainSegVol_to_eTIV_y1 | <b>R-squared:</b>          | 0.153    |
| <b>Model:</b>            | OLS                       | <b>Adj. R-squared:</b>     | 0.148    |
| <b>Method:</b>           | Least Squares             | <b>F-statistic:</b>        | 31.82    |
| <b>Date:</b>             | Sat, 04 Jul 2020          | <b>Prob (F-statistic):</b> | 7.27e-30 |
| <b>Time:</b>             | 20:24:27                  | <b>Log-Likelihood:</b>     | 2008.2   |
| <b>No. Observations:</b> | 890                       | <b>AIC:</b>                | -4004.   |
| <b>Df Residuals:</b>     | 884                       | <b>BIC:</b>                | -3976.   |
| <b>Df Model:</b>         | 5                         |                            |          |

  

|                        | coef    | std err | t       | P>  t | [0.025 | 0.975]   |
|------------------------|---------|---------|---------|-------|--------|----------|
| <b>Intercept</b>       | 0.8805  | 0.017   | 52.363  | 0.000 | 0.848  | 0.914    |
| <b>edad_visita1</b>    | -0.0024 | 0.000   | -10.940 | 0.000 | -0.003 | -0.002   |
| <b>sexo</b>            | 0.0105  | 0.002   | 5.722   | 0.000 | 0.007  | 0.014    |
| <b>apoe</b>            | -0.0022 | 0.002   | -1.048  | 0.295 | -0.006 | 0.002    |
| <b>familial_ad</b>     | 0.0020  | 0.002   | 1.011   | 0.312 | -0.002 | 0.006    |
| <b>nivel_educativo</b> | -0.0015 | 0.001   | -1.879  | 0.061 | -0.003 | 6.81e-05 |

  

|                       |        |                          |          |
|-----------------------|--------|--------------------------|----------|
| <b>Omnibus:</b>       | 22.145 | <b>Durbin-Watson:</b>    | 1.960    |
| <b>Prob(Omnibus):</b> | 0.000  | <b>Jarque-Bera (JB):</b> | 25.003   |
| <b>Skew:</b>          | 0.328  | <b>Prob(JB):</b>         | 3.72e-06 |
| <b>Kurtosis:</b>      | 3.494  | <b>Cond. No.</b>         | 1.48e+03 |

Figure 9 shows graphically the posterior distribution and the sampling for the three unobserved variables in the model ( $Age \rightarrow Brain2ICV$ ). The variable  $Brain2ICV$ ,  $B_i$ , is the observed data and therefore we do not need to sample its values. On the left-hand of Figure 9, we show the kernel density estimation of the marginal distributions of each parameter and on the right hand we show the individual sampled values.

Figure 10a shows the posterior distribution of the parameters in the  $Age \rightarrow Brain2ICV$  model. Figure 10b shows the *posterior predictive checks* which allows us to evaluate the model by comparing the observed data and the model predictions (100 posterior predictive samples). The figure shows a good match between the mean and the variance of the simulated data and the actual data.

### i. Causal analysis of memory performance

We investigate the direct causal relationship between three predictors of memory test performance, brain atrophy, school level and age (Figure 2).

The system of Equations 5 shows the model such that  $Brain2ICV$  regressed on Memory

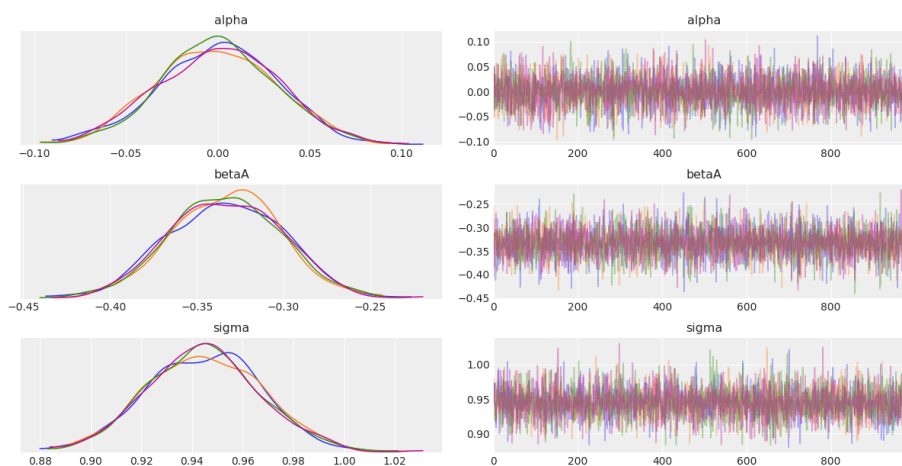

Figure 9: Posterior distribution (left-hand) and sampling (right-hand) for parameters  $\alpha$ ,  $\beta_A$ ,  $\sigma$  using PyMC3 [Salvatier et al., 2016]. The slope ( $\beta_A$ ) is  $-0.33$  (one standard deviation in age induces one third of change in the opposite direction in Brain2ICV) and  $\alpha$  is as expected 0 since the data are normalized.

Figure 10: HDI of the posterior and posterior predictive samples of the  $Age \rightarrow Brain2ICV$  regression model.

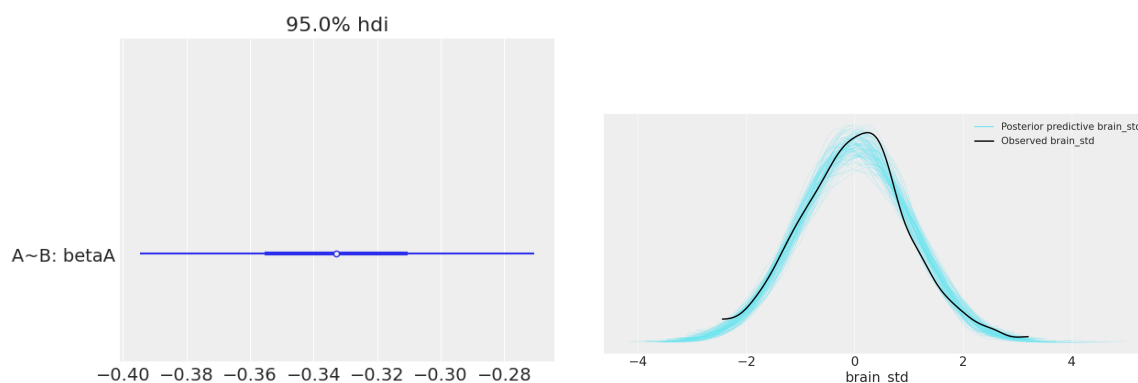

(a) HDI of the posterior of the parameter  $\beta_A$  in  $Age \rightarrow Brain2ICV$  model. As expected Age has a negative effect on Brain2ICV

(b) The black line is a KDE of the observed data, and the cyan lines are KDEs computed from each one of the 100 posterior predictive samples. The cyan lines reflect the uncertainty about the inferred distribution of the predicted data. The mean and the variance of the simulated data properly match the actual data.

performance,  $B \rightarrow M$ .

$$M_i \sim N(\mu_i, \sigma) \quad (5a)$$

$$\mu_i = \alpha + \beta_B B_i \quad (5b)$$

$$\alpha \sim N(0, 1) \quad (5c)$$

$$\beta_B \sim N(0, 1) \quad (5d)$$

$$\sigma \sim Exp(1) \quad (5e)$$

where  $M$  represents the mean of memory performance score which is not estimated but computed as a linear function of a predictor variable Brain2ICV ( $B$ ) and three additional parameters,  $\alpha$ ,  $\beta_B$  and  $\sigma$  which are unknown and therefore we need to postulate a prior distribution for each of them -Normal, Normal and Exponential. The variables have been previously standardized.

Equation 6 shows the model Age regressed on Memory performance,  $A \rightarrow M$ .

$$M_i \sim N(\mu_i, \sigma) \quad (6a)$$

$$\mu_i = \alpha + \beta_A A_i \quad (6b)$$

$$\alpha \sim N(0, 1) \quad (6c)$$

$$\beta_A \sim N(0, 1) \quad (6d)$$

$$\sigma \sim Exp(1) \quad (6e)$$

where  $M$  is the memory performance given by the recall test which is computed as a linear function of the predictor variable Age ( $A$ ) and three additional parameters,  $\alpha$ ,  $\beta_A$  and  $\sigma$  which are unknown and therefore we need to postulate a prior distribution as Equation 6 shows. The variables  $M$  and  $A$  are standardized.

Finally, we explore what happens when both predictors are included in a multivariate regression model  $A + B \rightarrow M$ , that is, Age and Brain2ICV are regressed on Memory as described in the system of Equations 7.

$$M_i \sim N(\mu_i, \sigma) \quad (7a)$$

$$\mu_i = \alpha + \beta_A A_i + \beta_B B_i \quad (7b)$$

$$\alpha \sim N(0, 1) \quad (7c)$$

$$\beta_A \sim N(0, 1) \quad (7d)$$

$$\beta_B \sim N(0, 1) \quad (7e)$$

$$\sigma \sim Exp(1) \quad (7f)$$

where  $M$  is the memory performance given by the recall test which is now computed as a linear function of the two predictor variables, Age ( $A$ ) and Brain2ICV ( $B$ ) and four additional parameters,  $\alpha$ ,  $\beta_A$ ,  $\beta_B$  and  $\sigma$  which are unknown and therefore we need to postulate a prior distribution as Equation 7 shows. As we did in the two previous models (Equation 5 and Equation 6), the variables  $M$ ,  $B$  and  $A$  are standardized and we use vague priors to make sure that priors do not introduced any undesirable bias in the results.

Figure 11 shows the scatter plot of memory and the predictors Brain2ICV ( $r_{BM} = 0.14$ ), Age ( $r_{AM} = -0.18$ ) and School Level ( $r_{SM} = 0.24$ ). According to correlation analysis shown in Section i, brain atrophy (Brain2ICV), School Level and Age are predictors, even if modest, of Memory performance.

The aging human brain • Gomez-Ramirez et al. (2020)

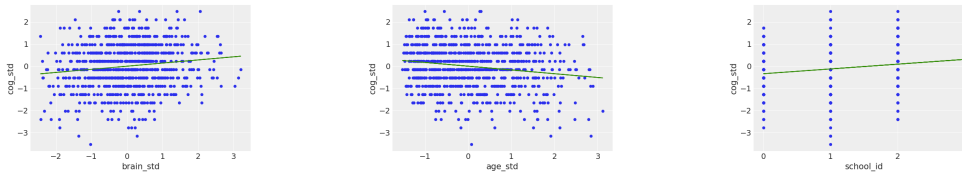

(a) Brain atrophy is associated with memory performance,  $r_{BM} = 0.14$ .  
 (b) Age is associated with memory performance,  $r_{AM} = -0.18$ .  
 (c) School level is associated with memory performance,  $r_{SM} = 0.24$ .

Figure 11: Scatter plot of memory test score and Brain2ICV (a), memory test score and Brain2ICV (b) and memory test score and School level (c). Brain2ICV, Age and Memory test score are standardized i.e. centered around the mean with a unit standard deviation.

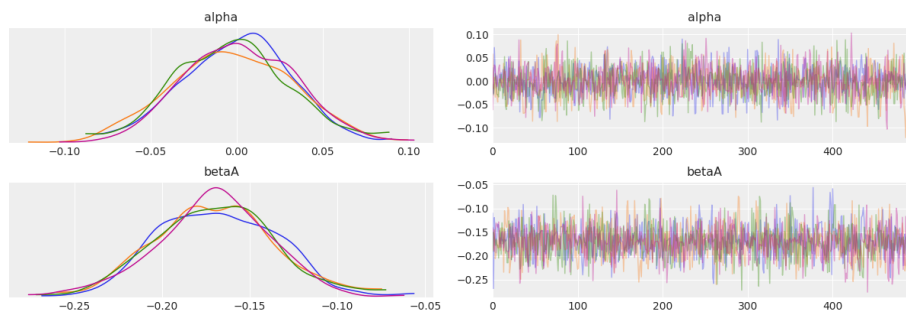

Figure 12: Trace plot of the regression model of  $B$  on  $M$  including the two non deterministic variables in the model  $\alpha$  and  $\beta_B$  ( $\mu$  is deterministic). On the left, the distribution of each parameter (4 chains) and on the right the sampling. The posterior mean of Brain2ICV (0.141) is positive, which means the larger Brain2ICV the larger the memory score. Importantly, the posterior distribution lies entirely on the positive side, the high density interval [3%, 97%] of the variable is defined in the range [0.074, 0.202].

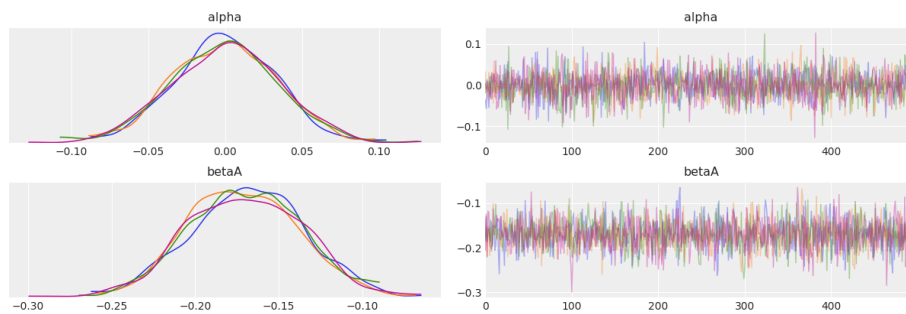

Figure 13: Trace plot of the regression model of Age on Memory including the two non deterministic variables in the model  $\alpha$  and  $\beta_A$ . On the left, the distribution of each parameter (4 chains) and on the right, the sampling. The posterior mean of Age (-0.171, Figure 13) is negative, which means the older the subject the less the memory score. The posterior lies entirely on the negative side, the high density interval [3%, 97%] of the variable is defined in the range [-0.235, -0.1].

The aging human brain • Gomez-Ramirez et al. (2020)

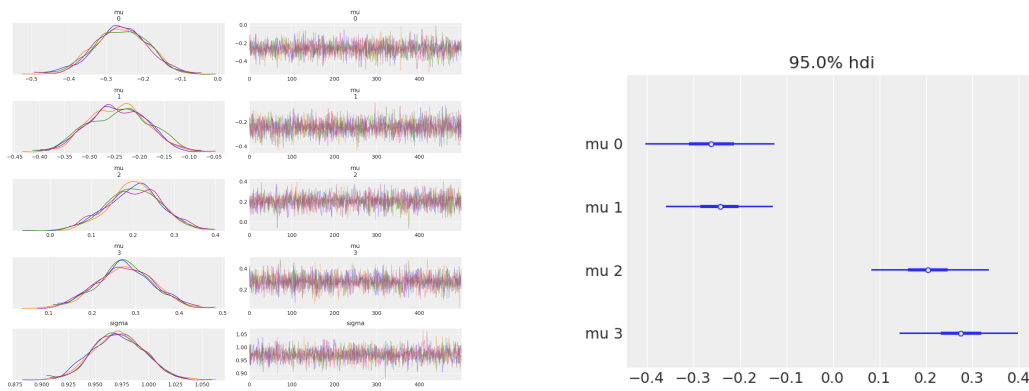

(a) Trace plot of the regression model of School level on Memory including the non deterministic variables  $0$ :no formal education,  $1$ : primary education,  $2$ : middle in the model  $\alpha$  and  $\beta_{S_i}, i = 1, 2, 3$ . On the left, the distribution of each parameter (4 chains) and on the right, the sampling. (b) Plot for the 4 estimated means, one per school level, or high school degree,  $3$ :university degree. There is a former have a negative association with the test score and the last a positive one, or simply said those with high school and university school do better on average in the memory score tests than those that lack formal education or have only primary education.

Figure 14: .

Figures 12, 13 and 14 shows the distribution (kernel density estimates) and sampled values of the parameters defined in Equations 5, 6 and 7, respectively.

Table 6 shows the posterior distribution of the model's parameters of the three regression models: Age on Memory  $M = \alpha + \beta_A * A$  (Equation 6); Brain2ICV on Memory  $M = \alpha + \beta_B * B$  (Equation 5) and School level on Memory  $M = \alpha + \beta_S * S$  (Equation 7).

Table 6: the table describes the mean, standard deviation and high posterior density interval (hdi) for the parameters described in the regression models described in Equations 5, 6 and 7.

|             | mean   | sd    | hdi 3% | hdi 97% |
|-------------|--------|-------|--------|---------|
| $\mu_A$     | -0.170 | 0.034 | -0.237 | -0.111  |
| $\sigma_A$  | 0.987  | 0.025 | 0.941  | 1.033   |
| $\mu_B$     | 0.141  | 0.034 | 0.074  | 0.202   |
| $\sigma_B$  | 0.991  | 0.023 | 0.952  | 1.036   |
| $\mu_{S_0}$ | -0.261 | 0.072 | -0.391 | -0.125  |
| $\mu_{S_1}$ | -0.243 | 0.060 | -0.358 | -0.137  |
| $\mu_{S_2}$ | 0.203  | 0.065 | 0.084  | 0.329   |
| $\mu_{S_3}$ | 0.275  | 0.065 | 0.159  | 0.404   |
| $\sigma_S$  | 0.971  | 0.024 | 0.927  | 1.015   |

So far, the three linear regression models built above,  $B \rightarrow M$  in Equation 5,  $A \rightarrow M$  in Equation 6,  $S \rightarrow M$  in Equation 7 and the posterior distribution of parameters ( $\beta_B, \beta_A$  and  $\beta_S$ ), support the findings in the correlation analysis ( $r_{BM} = 0.14, r_{AM} = -0.18, r_{SM} = -0.18$ ).

Nevertheless, Pearson's correlation provides a single number (the correlation coefficient  $r$ ),



while here we are computing the posterior distribution of the parameters in the model and we are therefore able to state whether the distribution lies on one side or the other of zero. For example, as the first two rows in Table 6 shows, the high density interval of  $\mu_A$  lies entirely on the negative side, that is, we are certain that age and memory score are negatively associated, that is the older, the smaller the memory score. Similarly, the linear regression model that relates memory with Brain2ICV  $M = \alpha + \beta_B * B$  (Equation 5) the posterior is always positive in the high density interval, that is, the larger the Brain2ICV (brain volume more preserved with age) the larger the memory score and likewise for the school level in the last two rows of Table 6, the high density interval of  $\mu_S$  is always positive, i.e. school level and memory score are positively associated the higher the school level the larger the memory score.

Since we are interested in what causes the memory performance observed in subjects, we need to perform a multiple regression to answer the following question: once we know the median age in a subject, Is there additional predictive power in also knowing the Brain2ICV? Figure 15 answers to that question, since it shows the behavior of the posterior of the parameters  $\beta_A$  and  $\beta_B$  for either the bivariate and multivariate cases. Based on Figure 15, the posterior mean for both Age,  $\beta_A$ , and Brain2ICV,  $\beta_B$ , in the multivariate case move closer to zero. The way to interpret this result is as follows: once we know the median Age of a person, there is little or no additional predictive power in also knowing her Brain2ICV (model 7). Likewise, once we know the median Brain2ICV of a person (model 6), there is little or no additional predictive power in also knowing her Age.

Age and Brain2ICV are correlated, so we have introduced multicollinearity in the multivariate regression model. Age and Brain2ICV, individually helps in predicting memory score but neither helps much when you know the other. For example,  $\beta_B$  went from  $0.141 \pm 0.034$  to  $0.093 \pm 0.035$  (green to blue bar in Figure 15) and  $\beta_A$  went from  $-0.171 \pm 0.034$  to  $-0.139 \pm 0.036$  (orange to blue bar in Figure 15).

Note that this result by any means signifies that Age or Brain2ICV have no information about cognition (i.e. memory performance score). The way to interpret the result is that there is no a direct causal path from Age to Memory or to Brain2ICV to Memory, the associations are in reality spurious and caused by the influence of variable(s) not included in the model. Thus, we answer in the negative the question stated above; Is there a direct causal relationship between brain atrophy (or age) and memory performance? No. The hypothesized causal link between brain and memory test lacks intermediate components. Corticohippocampal circuit need to incorporated in the DAG so that the do-calculus inference for causal effects can take place.

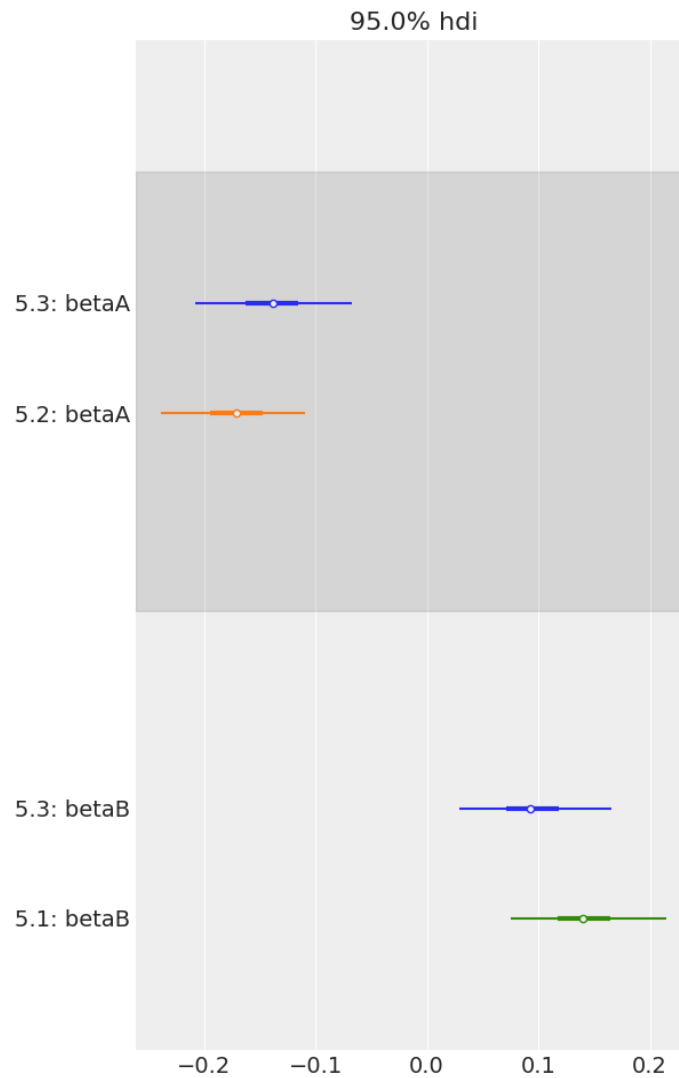

Figure 15: Posterior distribution of the parameters  $\beta_A$  (Age) and  $\beta_B$  (Brain2ICV) for either the bivariate and the multivariate model. In orange the mean and the spread of  $\beta_A$  in model 5 and in green of  $\beta_B$  in model 6. The posterior distribution when adding an additional predictor (multivariate regression) shown in blue adds little or no information, that is, the mean moves closer to zero in both cases. This implies that there is no direct causal link between Age or Brain2ICV and Memory.
